# Supplementary material for: Effects of sulfur compounds on the hydrogenation and isomerization of 1-hexene over a sulfided CoMo catalyst for hydrodesulfurization
Source: Royal Society of Chemistry journal article supplement (doi:10.1039/c5ra27583k), 2016-01-01
Supplement: c5ra27583k1.pdf [file c5ra27583k1.pdf]

## Effects of sulfur compounds on the hydrogenation and isomerization of 1-hexene over a sulfided CoMo catalyst for hydrodesulfurization

Chunyan Tu, Mingfeng Li\*, Huifeng Li, Yang Chu, Feng Liu, Hong Nie, Dadong Li

*(Research Institute of Petroleum Processing, SINOPEC, Beijing 100083, China)*

### Supporting Information:

**Table S1 Total acid and acid type distribution of Al<sub>2</sub>O<sub>3</sub>.**

| Sample                         | Lewis acid<br>(473 K)<br>(m mol/g) | Brønsted acid<br>(473 K)<br>(m mol/g) | Lewis acid<br>(623 K)<br>(m mol/g) | Brønsted acid<br>(623 K)<br>(m mol/g) |
|--------------------------------|------------------------------------|---------------------------------------|------------------------------------|---------------------------------------|
| Al <sub>2</sub> O <sub>3</sub> | 0.08                               | 0                                     | 0.05                               | 0                                     |
